# Supplementary material for: TSSAR: TSS annotation regime for dRNA-seq data
Source: Springer Nature journal article supplement (doi:10.1186/1471-2105-15-89), 2014-03-27

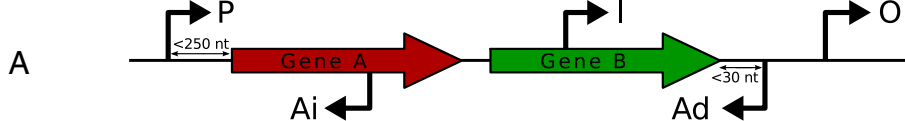

| position | strand | id         | score  | class | comment                       |
|----------|--------|------------|--------|-------|-------------------------------|
| 6581     | +      | TSS_000003 | 11.000 | Ai    | antisense to gene(s) HP0009;  |
| 9869     | +      | TSS_000004 | 99.000 | P     | 42nt upstream of gene HP0012; |
| 12115    | +      | TSS_000005 | 16.000 | I     | within gene(s) HP0013;        |
| 12693    | +      | TSS_000006 | 9.000  | P     | 35nt upstream of gene HP0014; |

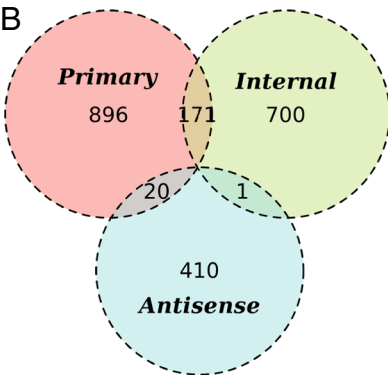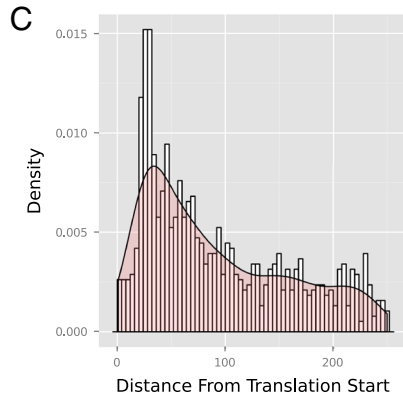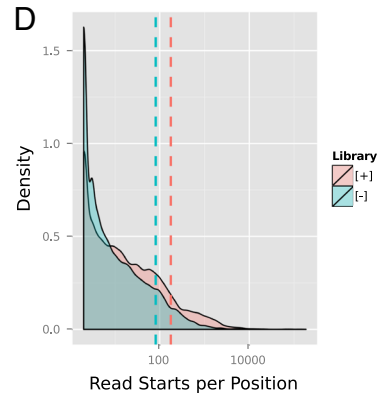

Supplement: 12859_2013_6343_MOESM2_ESM.pdf [file 12859_2013_6343_MOESM2_ESM.pdf]
