# Supplementary material for: TSSAR: TSS annotation regime for dRNA-seq data
Source: Springer Nature journal article supplement (doi:10.1186/1471-2105-15-89), 2014-03-27

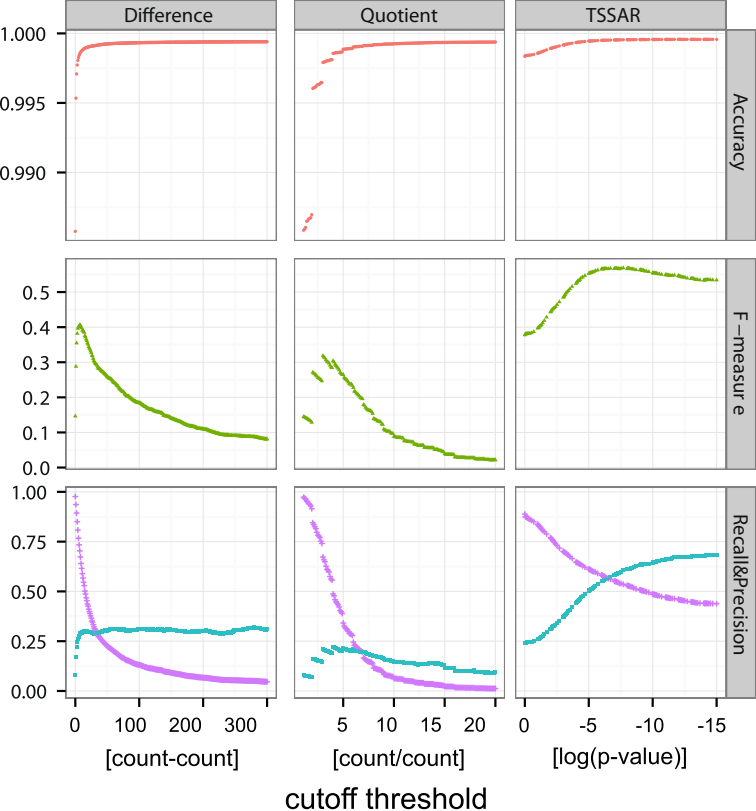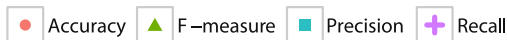

Supplement: 12859_2013_6343_MOESM4_ESM.pdf [file 12859_2013_6343_MOESM4_ESM.pdf]
