# Supplementary material for: TSSAR: TSS annotation regime for dRNA-seq data
Source: Springer Nature journal article supplement (doi:10.1186/1471-2105-15-89), 2014-03-27

A

Motif 1

E-value:  
4.0e-806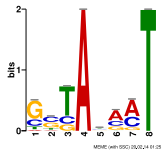

Motif 2

E-value:  
4.8e-009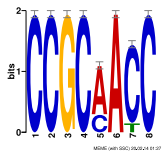

Motif 3

E-value:  
1.2e-003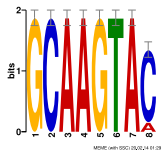

B

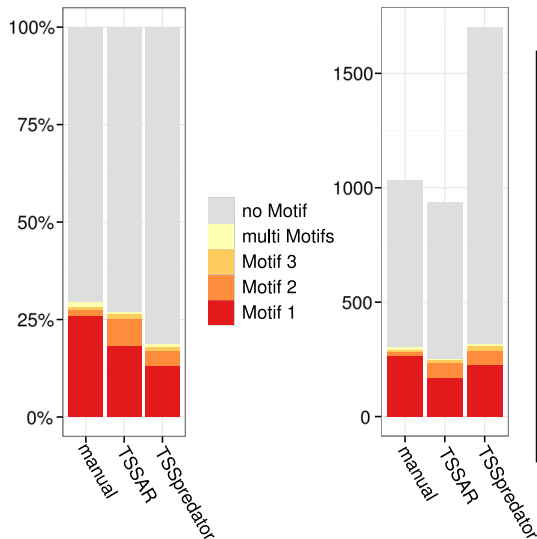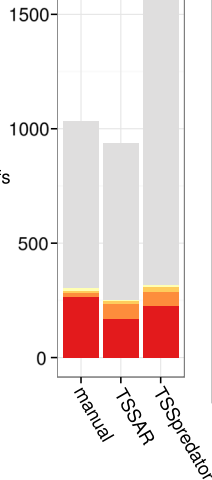

C

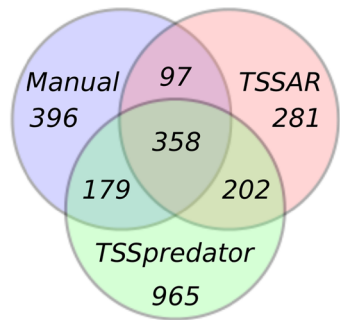

Supplement: 12859_2013_6343_MOESM6_ESM.pdf [file 12859_2013_6343_MOESM6_ESM.pdf]
